# Supplementary material for: Effect of social media use and computerized Stroop task on EEG spectral power and physical performance in taekwondo athletes: an experimental randomized trial
Source: Research Square preprint supplement (doi:10.21203/rs.3.rs-6814478/v1), 2025-06-12
Supplement: Supplementary file 1 [file 97b57b7b93afb51ee86d38d0.docx]

**Supplementary table 1.** Descriptive (mean ± standard derivation) values for intermittent taekwondo physical task

|  | **Modified Stroop Task** | | | **Social Media Use** | | | **Documentary** | | |
| --- | --- | --- | --- | --- | --- | --- | --- | --- | --- |
| **Rounds** | **1** | **2** | **3** | **1** | **2** | **3** | **1** | **2** | **3** |
| **Number of Kicks (n)** | 109±13 | 96±12 | 91±12 | 113±12 | 96±8 | 94±9 | 116±12 | 99±11 | 94±9 |
| **Fatigue Index (%)** | 31.5±18.7 | 18±14.8 | 7.6±14.7 | 31.9±14.8 | 13.7±19.4 | 8.87±19.1 | 33.9±15.9 | 22.4±14.4 | 12±11 |
| **Heart Rate (bpm)** | 181±6 | 181±7 | 182±5 | 182±8 | 182±6 | 184±7 | 183±8 | 182±7 | 182±5 |
| **Rating Perceived Exertion (u.a.)** | 14±2 | 15±2 | 16±2 | 14±2 | 15±2 | 16±3 | 14±2 | 15±2 | 16±2 |
| **Total Fatigue Index (%)** | 33.4±19.5 | | | 35.6±17.1 | | | 39.3±16.1 | | |

Random effect for number of kicks, heart rate, and RPE = subjects

Random effect for fatigue index = subjects, condition

**Supplementary table 2.** Descriptive values of frequency bands in each brain region in µV2/Hz

|  |  | **Modified Stroop Task** | | | | | **Social Media Use** | | | | | **Documentary** | | | | |  |
| --- | --- | --- | --- | --- | --- | --- | --- | --- | --- | --- | --- | --- | --- | --- | --- | --- | --- |
|  |  | Pre | Min 15 | Min 30 | Min 45 | Post | Pre | Min 15 | Min 30 | Min 45 | Post | Pre | Min 15 | Min 30 | Min 45 | Post |  |
|  | *Frontal* |  |  |  |  |  |  |  |  |  |  |  |  |  |  |  |  |
|  | Theta | 2.57  ±3.01 | 2.39  ±2.54 | 2.52  ±2.56 | 2.38  ±2.12 | 2.24  ±2.2 | 2.28  ±2.01 | 2.66  ±2.65 | 2.44  ±2.21 | 2.77  ±2.64 | 2.08  ±1.78 | 2.33  ±1.78 | 2.2  ±2.04 | 2.61  ±2.46 | 2.91  ±4.17 | 2.53  ±2.59 |  |
| Alpha 1 | 1.14  ±1.34 | 0.58  ±1.05 | 0.68  ±1.3 | 0.69  ±1.42 | 1.02  ±1.02 | 1.20  ±1.76 | 0.73  ±1.32 | 0.56  ±0.95 | 0.76  ±1.37 | 0.91  ±0.88 | 1.04  ±0.95 | 0.59  ±1.2 | 0.69  ±1.28 | 1.04  ±2.2 | 1.17  ±1.35 |  |
| Alpha 2 | 1.68  ±2.34 | 1.32  ±1.44 | 1.58  ±2.62 | 1.36  ±1.59 | 1.29  ±1.29 | 1.35  ±1.33 | 1.65  ±2.14 | 1.39  ±1.28 | 1.64  ±1.86 | 1.29  ±1.4 | 1.39  ±1.35 | 1.36  ±1.54 | 1.54  ±1.62 | 1.97  ±2.69 | 1.46  ±1.45 |  |
| Beta | 4.01  ±4.95 | 3.69  ±4.12 | 3.95  ±4.47 | 3.71  ±3.59 | 3.58  ±3.12 | 3.74  ±3.39 | 4.27  ±4.54 | 3.98  ±3.79 | 4.79  ±6.15 | 3.49  ±3.69 | 4.01  ±3.51 | 3.93  ±4.86 | 4.19  ±4.8 | 4.95  ±7.1 | 4.43  ±5.18 |  |
|  | *Central* |  |  |  |  |  |  |  |  |  |  |  |  |  |  |  |  |
|  | Theta | 1.58  ±1.16 | 1.73  ±1.14 | 1.81  ±1.16 | 1.55  ±0.89 | 1.24  ±0.83 | 1.17  ±0.73 | 1.28  ±0.77 | 1.7  ±1.31 | 1.52  ±0.98 | 1.04  ±0.75 | 1.43  ±1.33 | 1.5  ±1.57 | 1.35  ±1.1 | 1.49  ±1.33 | 1.18  ±0.88 |  |
| Alpha 1 | 1.23  ±1.6 | 0.83  ±0.84 | 0.97  ±1.15 | 0.75  ±0.78 | 0.93  ±0.95 | 0.9  ±0.94 | 0.52  ±0.43 | 0.82  ±0.82 | 0.72  ±0.58 | 0.94  ±1.15 | 0.89  ±0.9 | 0.81  ±1.01 | 0.79  ±1.26 | 0.98  ±1.2 | 0.94  ±1.24 |  |
| Alpha 2 | 1.61  ±1.64 | 1.16  ±1.18 | 1.42  ±1.66 | 1.03  ±0.91 | 1.17  ±1.35 | 1.18  ±1.1 | 0.92  ±0.73 | 1.45  ±2.08 | 1.09  ±0.85 | 0.88  ±0.67 | 1.18  ±1.25 | 1.18  ±1.64 | 1.06  ±1.04 | 1.35  ±2.05 | 1.13  ±1.52 |  |
| Beta | 2.35  ±2.1 | 2.51  ±1.92 | 3.44  ±3.15 | 2.4  ±1.42 | 2.12  ±1.75 | 1.89  ±1.27 | 2.07  ±1.61 | 2.57  ±2.11 | 2.2  ±1.61 | 1.71  ±1.3 | 1.95  ±1.8 | 2.24  ±2.86 | 2.33  ±2.44 | 2.21  ±2.26 | 2.02  ±1.91 |  |
|  | *Parietal* |  |  |  |  |  |  |  |  |  |  |  |  |  |  |  |  |
|  | Theta | 1.68  ±1.28 | 2.59  ±2.15 | 1.88  ±1.36 | 1.75  ±1.44 | 1.33  ±1.2 | 1.47  ±1.39 | 1.74  ±1.16 | 1.9  ±1.32 | 1.65  ±0.87 | 1.15  ±1.03 | 1.43  ±0.9 | 1.5  ±1.05 | 1.78  ±1.18 | 1.72  ±1.73 | 1.3  ±0.94 |  |
| Alpha 1 | 1.29  ±1.31 | 2.4  ±1.9 | 1.03  ±0.91 | 0.88  ±0.88 | 1.30  ±2.16 | 1.04  ±0.99 | 0.64  ±0.43 | 0.91  ±0.88 | 0.69  ±0.5 | 1.15  ±1.42 | 1.00  ±1.04 | 0.75  ±0.84 | 0.87  ±0.87 | 1.17  ±1.76 | 1.16  ±1.33 |  |
| Alpha 2 | 1.78  ±1.7 | 2.17  ±3.05 | 1.65  ±1.54 | 1.29  ±1.28 | 1.26  ±1.46 | 1.26  ±1.19 | 1.04  ±0.82 | 1.41  ±1.42 | 1.06  ±0.86 | 1.18  ±1 | 1.30  ±1.13 | 1.13  ±1.05 | 1.26  ±1.13 | 1.45  ±2.49 | 1.23  ±1.25 |  |
| Beta | 2.5  ±2.06 | 4.56  ±5.09 | 3.47  ±3.45 | 2.59  ±2.3 | 2.31  ±2.17 | 2.35  ±2.76 | 3.05  ±3.15 | 3.02  ±2.45 | 2.38  ±1.5 | 1.91  ±1.65 | 2.18  ±1.61 | 2.5  ±2.69 | 2.89  ±2.17 | 2.62  ±2.75 | 2.2  ±2.1 |  |

Nota: Pre = Pre-cognitive manipulation; Min 15 = measure at minute 15; Min 30 = measure at minute 30; Min 45 = measure at minute 45; Post = Post-cognitive manipulation; Theta = 4-8 Hz; Alpha 1 = 8-10 Hz; Alpha 2 = 10-13 Hz; Beta = 13-30 Hz

**Supplementary table 3.** Statistic values for rest state and task state for brain region and frequency band

|  |  |  | ***Rest state*** | | | | | | | | | ***Task state*** | | | | | | | | |  |
| --- | --- | --- | --- | --- | --- | --- | --- | --- | --- | --- | --- | --- | --- | --- | --- | --- | --- | --- | --- | --- | --- |
|  |  |  | **Condition** | | | **Time** | | | **Interaction** | | | **Condition** | | | **Time** | | | **Interaction** | | |  |
|  |  |  | X2 | p | ƞ2p | X2 | p | ƞ2p | X2 | p | ƞ2p | X2 | p | ƞ2p | X2 | p | ƞ2p | X2 | p | ƞ2p |  |
|  | Frontal | Theta | 1.18 | 0.55 | 0.00 | 0.2 | 0.65 | 0.00 | 2.02 | 0.36 | 0.00 | 1.33 | 0.51 | 0.00 | 0.22 | 0.89 | 0.00 | 3.2 | 0.52 | 0.00 |  |
| Alpha 1 | 0.2 | 0.9 | 0.00 | 1.12 | 0.28 | 0.00 | 3.69 | 0.15 | 0.00 | 0.47 | 0.78 | 0.00 | 4.82 | 0.09 | 0.00 | 4.7 | 0.31 | 0.00 |  |
| Alpha 2 | 1.7 | 0.42 | 0.00 | 1.42 | 0.23 | 0.00 | 2.63 | 0.26 | 0.00 | 0.86 | 0.64 | 0.00 | 0.53 | 0.76 | 0.00 | 6.66 | 0.15 | 0.00 |  |
| Beta | 3.61 | 0.16 | 0.00 | 0.04 | 0.83 | 0.00 | 1.36 | 0.5 | 0.00 | 1.83 | 0.4 | 0.00 | 0.36 | 0.83 | 0.00 | 1.99 | 0.73 | 0.00 |  |
|  | Central | Theta | 3.65 | 0.16 | 0.01 | 1.49 | 0.22 | 0.01 | 1.07 | 0.58 | 0.00 | 3.74 | 0.15 | 0.00 | 0.82 | 0.66 | 0.00 | 4.12 | 0.38 | 0.01 |  |
| Alpha 1 | 0.84 | 0.65 | 0.00 | 0.61 | 0.43 | 0.00 | 1.77 | 0.41 | 0.00 | 2.4 | 0.3 | 0.00 | 2.27 | 0.32 | 0.00 | 5.37 | 0.25 | 0.00 |  |
| Alpha 2 | 2.31 | 0.31 | 0.01 | 0.82 | 0.36 | 0.01 | 0.26 | 0.87 | 0.00 | 0.23 | 0.88 | 0.00 | 2.18 | 0.33 | 0.00 | 4.86 | 0.3 | 0.01 |  |
| Beta | 1.8 | 0.4 | 0.01 | 1.04 | 0.3 | 0.00 | 1.2 | 0.54 | 0.00 | 1.2 | 0.54 | 0.01 | 6.27 | 0.04 | 0.01 | 2.3 | 0.68 | 0.00 |  |
|  | Parietal | Theta | 6.32 | 0.04 | 0.00 | 14.68 | <0.001 | 0.01 | 1.72 | 0.42 | 0.00 | 1.66 | 0.43 | 0.01 | 3.15 | 0.2 | 0.00 | 15.14 | 0.004 | 0.02 |  |
| Alpha 1 | 1.62 | 0.44 | 0.00 | 0.45 | 0.5 | 0.00 | 12.29 | 0.002 | 0.00 | 15.22 | <0.001 | 0.01 | 0.01 | 0.99 | 0.00 | 20.29 | <0.001 | 0.02 |  |
| Alpha 2 | 1.76 | 0.41 | 0.01 | 3.17 | 0.07 | 0.00 | 2.52 | 0.28 | 0.00 | 6 | 0.05 | 0.01 | 0.77 | 0.68 | 0.00 | 12.81 | 0.01 | 0.01 |  |
| Beta | 0.69 | 0.7 | 0.00 | 0.65 | 0.41 | 0.00 | 2.81 | 0.24 | 0.005 | 2.29 | 0.31 | 0.01 | 2.83 | 0.24 | 0.01 | 11.52 | 0.02 | 0.01 |  |

Random effect for frontal rest state alpha 1, rest state alpha 2, and rest state beta = subject

Random effect for frontal rest state theta = subject and time

Random effect for frontal tasks state alpha 1 = subject and condition

Random effect for frontal task state theta, task state alpha 2, and task state beta = subject, condition, and time

Random effect for central task state theta and task state alpha 2 = subject

Random effect for central rest state alpha 2 = subject and condition

Random effect for central rest state beta = subject and condition*time

Random effect for central rest state theta, rest state alpha 1, task state alpha 1, and task state beta = subject, condition, and time

Random effect for parietal rest state theta and task state alpha 1 = subject

Random effect for parietal rest state alpha 2 and task state theta = subject and condition

Random effect for parietal rest state alpha 1, rest state beta, task state alpha 2, and task state beta = subject, condition, and time
